# Supplementary material for: CUDASW++2.0: enhanced Smith-Waterman protein database search on CUDA-enabled GPUs based on SIMT and virtualized SIMD abstractions
Source: Springer Nature journal article supplement (doi:10.1186/1756-0500-3-93), 2010-04-06
Supplement: 13104_2010_497_MOESM6_ESM.pdf [file 13104_2010_497_MOESM6_ESM.pdf]

/\*\*\*\*\*\*ASSUMPTION\*\*\*\*\*

Query sequence length  $\rightarrow qlen$ , aligned to 8 bytes and padded with dummy residues;  
Subject sequence length  $\rightarrow dblen$ , aligned to 8 bytes and padded with dummy residues;

\*\*\*\*\*/

for ( $i = 1; i \leq qlen; i += 8$ ) {

  Initialize all the relevant variables;

  for ( $j = 1; j \leq dblen; j += 4$ ) {

    Load the packed 4 residues between  $j$  and  $j + 3$  from texture memory to shared memory;

    for ( $k = 0; k < 4; k++$ ) {

      Get the  $(j + k)$ -th residue of the subject sequence from shared memory;

      Load  $H$  and  $E$  values of the cell  $(i - 1, j + k)$  from global memory;

    Load substitution scores for cells from  $i$  to  $i + 3$  from the query profile;

    Compute the  $H$ ,  $E$  and  $F$  values of the cells from  $(i, j + k)$  to  $(i + 3, j + k)$ ;  
    and calculate the maximum score;

    Load substitution scores for cells from  $i + 4$  to  $i + 7$  from the query profile;

    Compute the  $H$ ,  $E$  and  $F$  values of the cells from  $(i + 4, j + k)$  to  $(i + 7, j + k)$ ;  
    and calculate the maximum score;

    Save  $H$  and  $E$  values of the cell  $(i + 7, j + k)$  from global memory;

  }

}

}
