# Supplementary material for: CUDASW++2.0: enhanced Smith-Waterman protein database search on CUDA-enabled GPUs based on SIMT and virtualized SIMD abstractions
Source: Springer Nature journal article supplement (doi:10.1186/1756-0500-3-93), 2010-04-06
Supplement: 13104_2010_497_MOESM8_ESM.pdf [file 13104_2010_497_MOESM8_ESM.pdf]

/\*\*\*\*\*\*ASSUMPTION\*\*\*\*\*

$VL$  is vector length;

$PL$  is the specified partition length, which is multiples of  $VL$ .

\*\*\*\*\*/

Initialize relevant variables and global memory buffers;

for (each partition of length  $PL$ ){

  for (the  $j$ -th residue of the subject sequence){

    Load the  $H$  value of the  $j$ -th cell in the last row of the previous partition, and the  $F$  value of the  $j$ -th cell in the first row of this partition;

    Initialize  $vecF$  using the above  $F$  value;

    Initialize  $vecH(1, j)$  using the above  $H$  value;

    Perform the inner loop using striped query profile of this partition  
    vector segment by vector segment using registers (manually unrolled);

    Perform the lazy-F loop to recalculate  $F$  values, where the maximum number  
    of iterations is  $VL - 1$  with each iteration checking the whole partition;

    The thread corresponding to the leftmost element (the  $(VL - 1)$ -th element) saves  
    the  $H$  value of the  $j$ -th cell of the last row of this partition, calculates and  
    saves the  $F$  value of the  $j$ -th cell of the first row of the next partition.

  }

}

if (there is one partition of length  $\leq PL$  left){

  Perform the same operations with an above partition, except for storing the  $H$  and  
   $F$  values of the  $j$ -th cell of the last row of this partition;

}

Calculate the alignment score using recursion;
