# Supplementary material for: CUDASW++2.0: enhanced Smith-Waterman protein database search on CUDA-enabled GPUs based on SIMT and virtualized SIMD abstractions
Source: Springer Nature journal article supplement (doi:10.1186/1756-0500-3-93), 2010-04-06

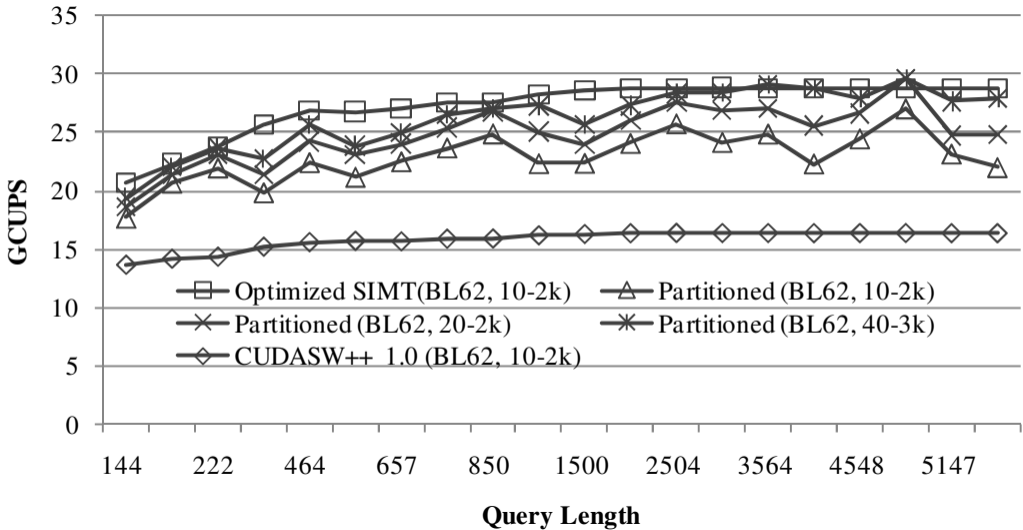

Supplement: 13104_2010_497_MOESM10_ESM.pdf [file 13104_2010_497_MOESM10_ESM.pdf]
